# Supplementary material for: Investigation of glycerol polymerization in the clinker grinding process
Source: Royal Society of Chemistry journal article supplement (doi:10.1039/c0gc00107d), 2010-11-18
Supplement: c0gc00107d.pdf [file c0gc00107d.pdf]

### Additional Information - Investigation of glycerol polymerization in the clinker grinding process (c0gc00107d)

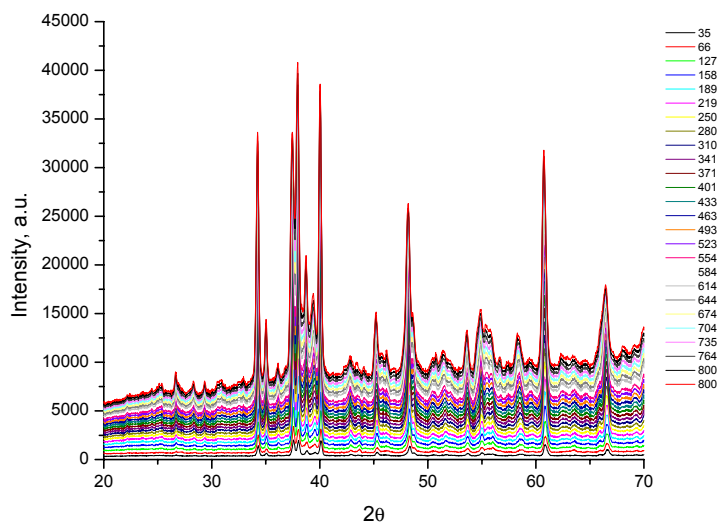

Figure S1. *In-situ* XRD measurements on clinker B-bio-glycerol mixture during calcination from room temperature to 800 °C.

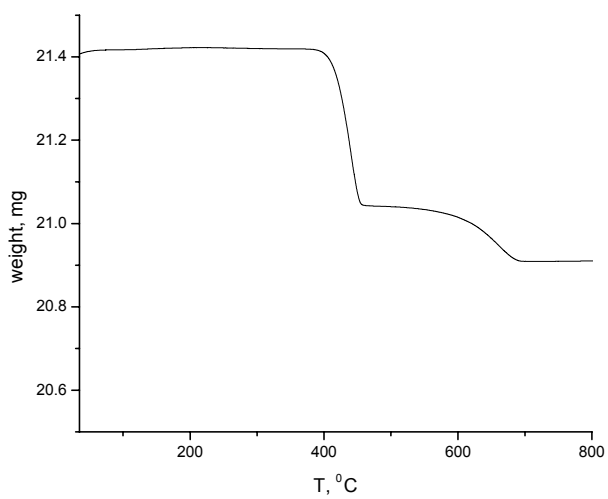

Figure S2. TG analysis of clinker B.
